# Supplementary material
Source: Springer Nature journal article supplement (https://www.springermedizin.de/resource/supplementary/13231_2012_71_MOESM3_ESM.pdf/9676480)

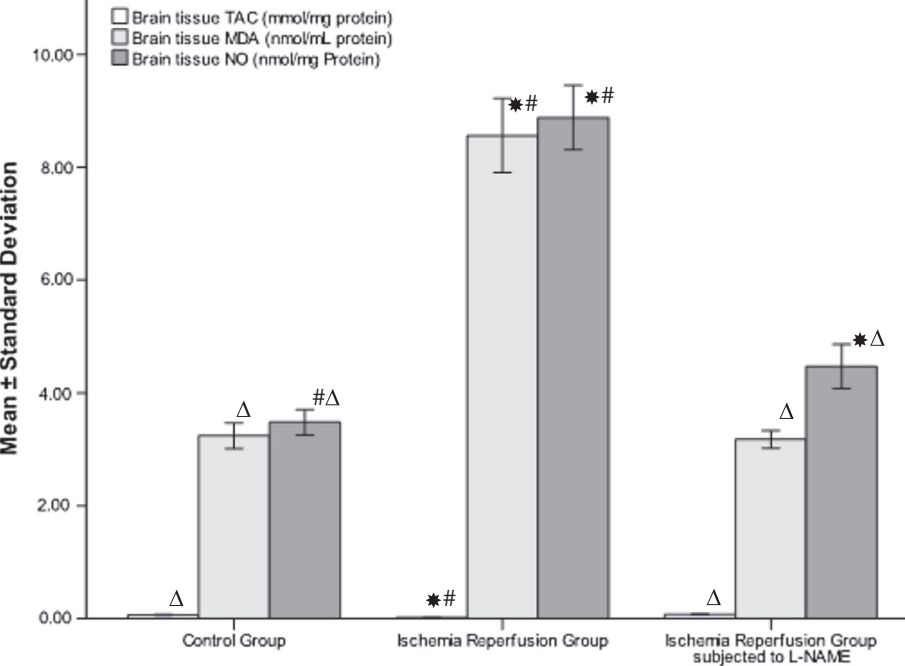

Supplement: MOESM3 [file 9676480]
